# Supplementary material
Source: PubMed Central journal article supplement (PMC3406123)
Supplement: AEM.01435-12_zam999103577so1.pdf [file AEM.01435-12_zam999103577so1.pdf]

### Legends for Supplementary Figure S1.

Environment cluster analyses, showing the relationship of different samples. MCC: mission subsystem component surface samples, CR: cleanroom, JPL-SAF: Jet Propulsion Laboratory-Spacecraft Assembly Facility, JPL-144: Jet Propulsion Laboratory – Building 144 cleanroom, LBNL: Lawrence Berkeley National Laboratory, GSE: ground support equipment. Scale bar represents 3% difference.

# Environmental clustering of bacterial diversity

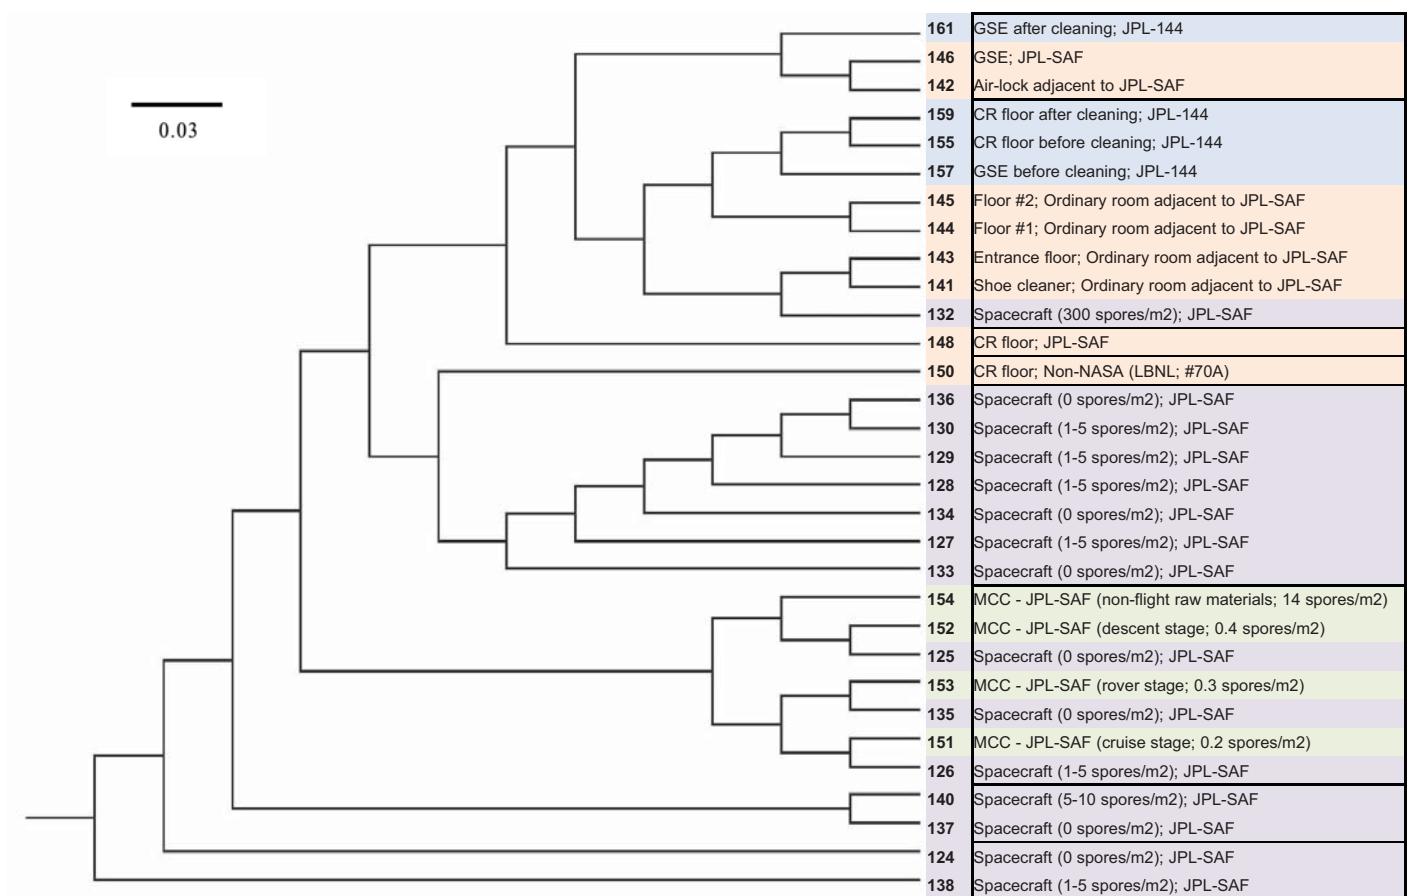

**Supplementary Figure 1**
